# Supplementary material for: Different Roles of Introgression on the Demographic Change in Two Snakebark Maples, Acer caudatifolium and A. morrisonense, with Contrasted Postglacial Expansion Routes
Source: MDPI journal article supplement (doi:10.3390/plants11050644), 2022-02-26
Supplement: s1 [file s1]

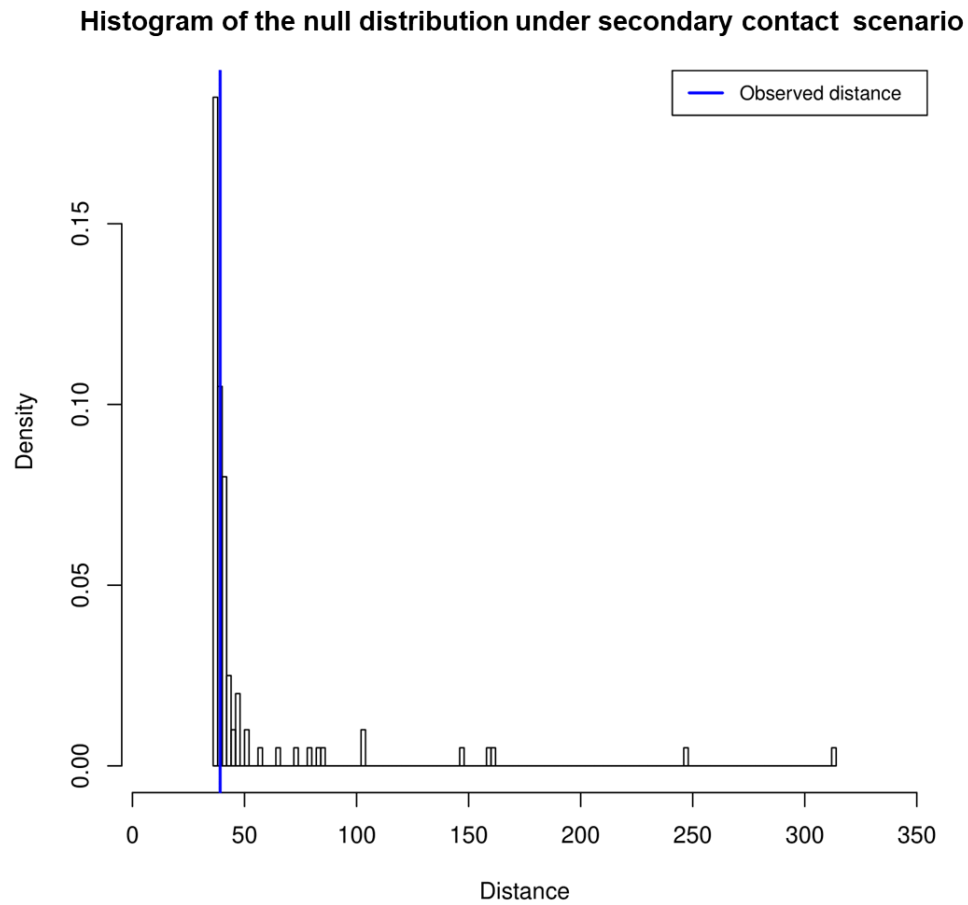

**Figure S1.** Histogram of the distribution under secondary contact (SC) scenario and the observed value.

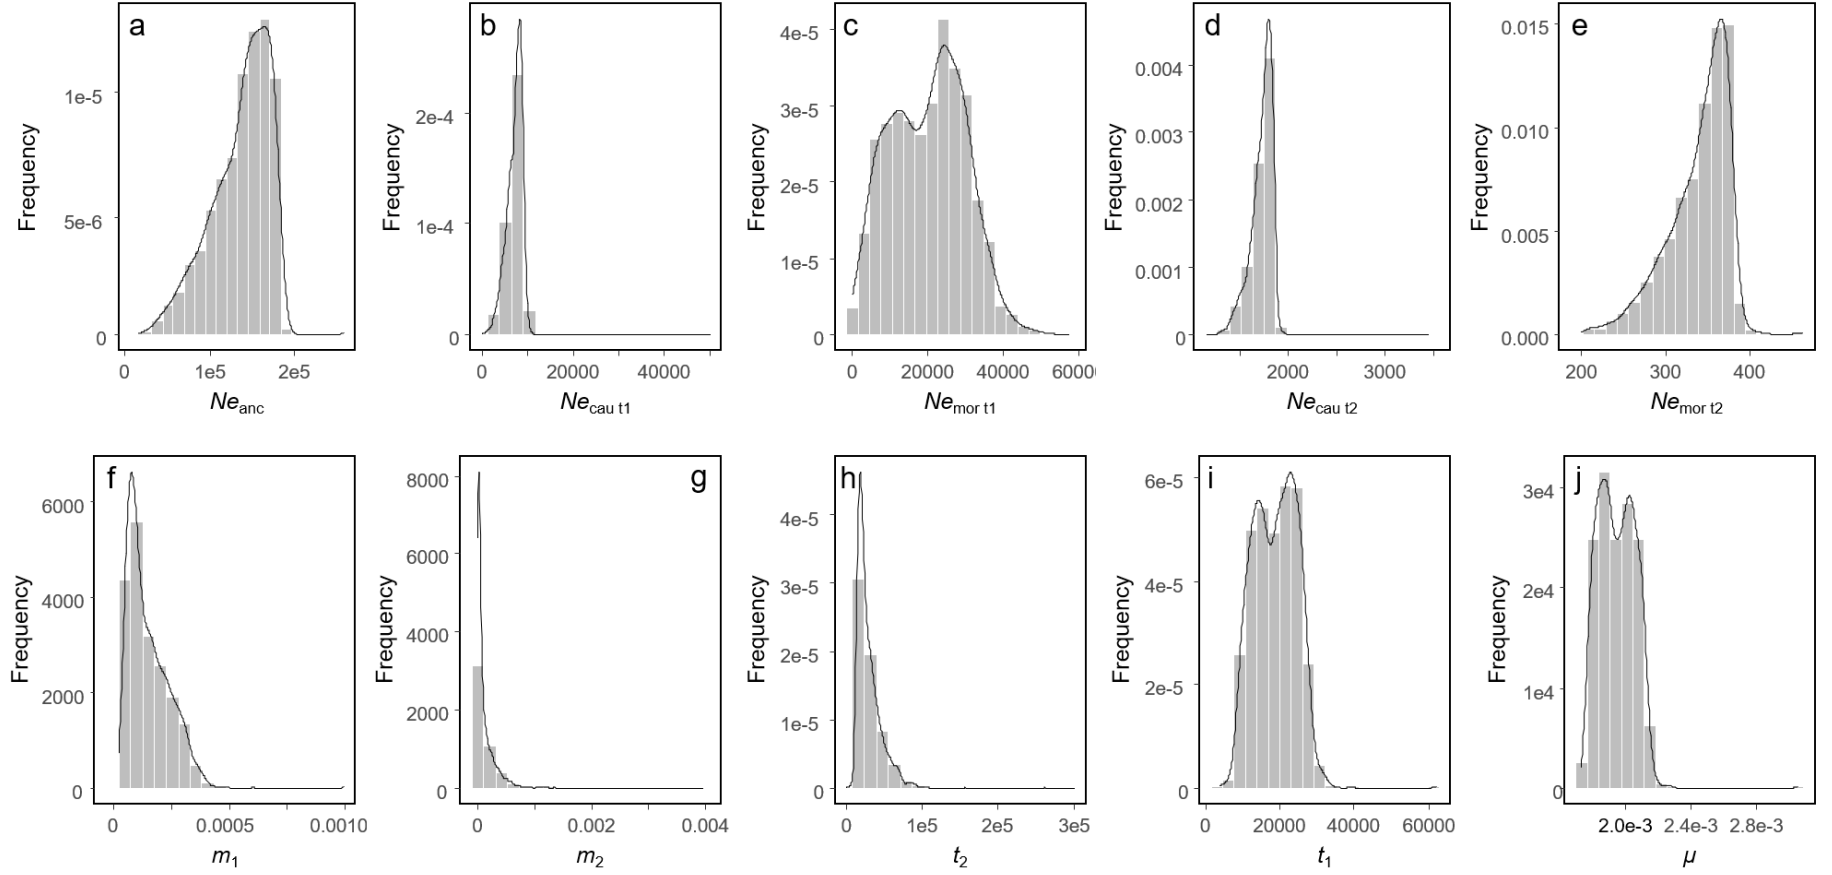

**Figure S2.** The frequency of marginal density of the best-fit scenario "secondary contact" (SC). **(a~e)** Effective population sizes of two maple species at  $t_1$  ( $Ne_{cau\ t1}$  and  $Ne_{mor\ t1}$ ) and  $t_2$  ( $Ne_{cau\ t2}$  and  $Ne_{mor\ t2}$ ) and their common ancestor ( $Ne_{anc}$ ); **(f)** and **(g)** migration rates from *A. caudatifolium* to *A. morrisonense* ( $m_1$ ) and the opposite direction ( $m_2$ ); **(h)** and **(i)** divergence time between species ( $t_1$ ) and the onset time of interspecific gene flow ( $t_2$ ); **(j)** mutation rate.

**Table S1.** Sampling sites and sample size

| Population | Lat.     | Lon.      | <i>A. caudatifolium</i> |          | <i>A. morrisonense</i> |          |
|------------|----------|-----------|-------------------------|----------|------------------------|----------|
|            |          |           | Alt. (m)                | <i>N</i> | Alt. (m)               | <i>N</i> |
| RF         | 25 °04'N | 121 °47'E | 381-484                 | 9        | -                      | -        |
| YMS        | 25 °10'N | 121 °31'E | 762-1021                | 33       | -                      | -        |
| LLS        | 24 °41'N | 121 °24'E | 1166-1317               | 18       | 1308-1577              | 19       |
| JS         | 24 °40'N | 121 °16'E | 1197-1468               | 21       | -                      | -        |
| SKR        | 24 °33'N | 121 °08'E | 1546-1975               | 30       | 1933-2021              | 18       |
| DXS        | 24 °14'N | 120 °58'E | 1680-2026               | 26       | 1855-2034              | 30       |
| MF         | 24 °05'N | 121 °10'E | 2087-2283               | 31       | 2087-2321              | 31       |
| DD         | 23 °46'N | 121 °10'E | 2196-2396               | 5        | 2236-2455              | 6        |
| RL         | 23 °42'N | 120 °55'E | 1362-1642               | 17       | -                      | -        |
| TTC        | 23 °31'N | 120 °54'E | 1604-2388               | 31       | 1648-2350              | 31       |
| ALS        | 23 °28'N | 120 °51'E | 1930-2404               | 22       | 2299-2540              | 30       |
| STC        | 23 °16'N | 120 °55'E | 2324                    | 1        | 2324                   | 10       |
| TJ         | 23 °03'N | 120 °44'E | 1467-1490               | 2        | -                      | -        |
| JBS        | 23 °33'N | 120 °45'E | 1306-2040               | 39       | 1280-1306              | 2        |
| JSY        | 22 °24'N | 120 °45'E | 1257                    | 18       | -                      | -        |
| MC         | 24 °37'N | 121 °29'E | 1106-1218               | 25       | -                      | -        |
| TPS        | 24 °31'N | 121 °31'E | 1566-1764               | 15       | 1471-1824              | 26       |
| SY         | 24 °20'N | 121 °19'E | 1848-2000               | 31       | 1796-2039              | 25       |
| TRK        | 24 °11'N | 121 °20'E | 2336-2987               | 27       | 2336-2700              | 32       |
| LD         | 23 °14'N | 120 °59'E | 2033-2309               | 29       | 1939-2309              | 36       |

**Table S2.** Search ranges of parameters in ABC model

| Parameter             | Type     | Distribution | Range                   |
|-----------------------|----------|--------------|-------------------------|
| $Ne_{\text{cau } t2}$ | interger | unif         | 100-10 <sup>4</sup>     |
| $Ne_{\text{mor } t2}$ | interger | unif         | 100-10 <sup>4</sup>     |
| $N_{\text{cau}}$      | decimal  | unif         | 0.01-100                |
| $N_{\text{mor}}$      | decimal  | unif         | 0.01-100                |
| $N_{\text{anc}}$      | decimal  | unif         | 0.001-1000              |
| $m_1$                 | decimal  | logunif      | 10 <sup>-9</sup> -0.1   |
| $m_2$                 | decimal  | logunif      | 10 <sup>-9</sup> -0.1   |
| $t_2$                 | interger | logunif      | 100-10 <sup>6</sup>     |
| $t_1$                 | interger | logunif      | 100-10 <sup>6</sup>     |
| $\mu$                 | decimal  | logunif      | 10 <sup>-5</sup> -0.001 |

**Rule**

$$t_1 > t_2$$

$$Ne_{\text{anc}} = Ne_{\text{mor } t2} \times N_{\text{anc}}; Ne_{\text{cau } t1} = Ne_{\text{cau } t2} \times N_{\text{cau}}; Ne_{\text{mor } t1} = Ne_{\text{mor } t2} \times N_{\text{mor}}$$

**Table S3.** Genetic diversity of each sampled population and species revealed by private allele frequencies, number of alleles per locus ( $N_a$ ), effective number of alleles per locus ( $N_e$ ), the information index ( $I$ ), the observed ( $H_o$ ), expected ( $H_e$ ) and unbiased expected heterozygosity ( $uHe$ ), and Fixation index ( $F$ ).

| Population              | N   | Private allele<br>freq. | Na    |       | Ne    |       | I     |       | Ho    |       | He    |       | uHe   |       | F      |       |
|-------------------------|-----|-------------------------|-------|-------|-------|-------|-------|-------|-------|-------|-------|-------|-------|-------|--------|-------|
|                         |     |                         | Mean  | SE    | Mean   | SE    |
| <i>A. caudatifolium</i> |     |                         |       |       |       |       |       |       |       |       |       |       |       |       |        |       |
| YMS                     | 29  | 0.0172                  | 2.647 | 0.373 | 1.599 | 0.217 | 0.446 | 0.126 | 0.195 | 0.059 | 0.235 | 0.067 | 0.239 | 0.069 | 0.200  | 0.084 |
| MF                      | 22  | 0                       | 1.941 | 0.315 | 1.359 | 0.146 | 0.300 | 0.098 | 0.122 | 0.045 | 0.172 | 0.056 | 0.177 | 0.057 | 0.268  | 0.072 |
| TRK                     | 24  | 0                       | 2.353 | 0.308 | 1.453 | 0.141 | 0.415 | 0.094 | 0.180 | 0.049 | 0.232 | 0.053 | 0.237 | 0.055 | 0.293  | 0.104 |
| SY                      | 25  | 0.0208                  | 2.235 | 0.379 | 1.425 | 0.186 | 0.352 | 0.107 | 0.148 | 0.049 | 0.189 | 0.056 | 0.193 | 0.057 | 0.285  | 0.099 |
| TPS                     | 11  | 0                       | 2.176 | 0.404 | 1.507 | 0.202 | 0.383 | 0.119 | 0.182 | 0.061 | 0.213 | 0.064 | 0.223 | 0.067 | 0.149  | 0.093 |
| MC                      | 24  | 0.0208                  | 2.529 | 0.493 | 1.471 | 0.220 | 0.361 | 0.125 | 0.146 | 0.051 | 0.180 | 0.063 | 0.184 | 0.064 | 0.111  | 0.046 |
| JS                      | 21  | 0                       | 2.882 | 0.492 | 1.769 | 0.282 | 0.551 | 0.134 | 0.179 | 0.056 | 0.290 | 0.065 | 0.297 | 0.067 | 0.331  | 0.123 |
| DXS                     | 19  | 0.1316                  | 4.059 | 0.949 | 2.905 | 0.751 | 0.764 | 0.214 | 0.172 | 0.052 | 0.342 | 0.087 | 0.352 | 0.090 | 0.288  | 0.110 |
| RL                      | 13  | 0.0385                  | 3.765 | 0.860 | 2.754 | 0.604 | 0.760 | 0.208 | 0.209 | 0.055 | 0.356 | 0.087 | 0.371 | 0.091 | 0.218  | 0.117 |
| TTC                     | 26  | 0                       | 2.588 | 0.403 | 1.386 | 0.147 | 0.381 | 0.098 | 0.183 | 0.044 | 0.200 | 0.050 | 0.204 | 0.051 | 0.074  | 0.082 |
| ALS                     | 19  | 0.1053                  | 4.235 | 0.961 | 2.899 | 0.683 | 0.825 | 0.209 | 0.236 | 0.063 | 0.381 | 0.084 | 0.391 | 0.086 | 0.196  | 0.125 |
| TJ                      | 2   | 0                       | 1.647 | 0.226 | 1.584 | 0.211 | 0.359 | 0.116 | 0.206 | 0.096 | 0.228 | 0.070 | 0.304 | 0.094 | 0.162  | 0.192 |
| LD                      | 26  | 0.0962                  | 4.588 | 1.115 | 2.703 | 0.589 | 0.786 | 0.214 | 0.170 | 0.042 | 0.354 | 0.086 | 0.361 | 0.088 | 0.292  | 0.095 |
| LLS                     | 18  | 0.0833                  | 3.882 | 0.790 | 2.373 | 0.473 | 0.729 | 0.191 | 0.203 | 0.057 | 0.338 | 0.082 | 0.348 | 0.085 | 0.277  | 0.095 |
| RF                      | 9   | 0                       | 2.412 | 0.446 | 1.810 | 0.310 | 0.509 | 0.145 | 0.168 | 0.052 | 0.271 | 0.071 | 0.288 | 0.075 | 0.238  | 0.113 |
| STC                     | 1   | 0                       | 1.176 | 0.095 | 1.176 | 0.095 | 0.122 | 0.066 | 0.176 | 0.095 | 0.088 | 0.048 | 0.176 | 0.095 | -1.000 | 0.000 |
| JSY                     | 13  | 0.2307                  | 2.882 | 0.685 | 2.172 | 0.482 | 0.556 | 0.183 | 0.080 | 0.035 | 0.273 | 0.083 | 0.284 | 0.086 | 0.618  | 0.098 |
| SKR                     | 28  | 0.0548                  | 4.294 | 0.931 | 2.552 | 0.469 | 0.829 | 0.192 | 0.213 | 0.063 | 0.397 | 0.084 | 0.404 | 0.085 | 0.361  | 0.120 |
| DD                      | 5   | 0                       | 2.235 | 0.349 | 1.934 | 0.309 | 0.534 | 0.146 | 0.105 | 0.051 | 0.297 | 0.079 | 0.335 | 0.089 | 0.612  | 0.108 |
| JBS                     | 36  | 0.0166                  | 4.176 | 1.015 | 2.468 | 0.682 | 0.657 | 0.199 | 0.111 | 0.033 | 0.296 | 0.080 | 0.300 | 0.081 | 0.481  | 0.098 |
| Total                   | 371 | -                       | 8.588 | 1.857 | 2.024 | 0.309 | 0.799 | 0.180 | 0.169 | 0.044 | 0.341 | 0.073 | 0.341 | 0.073 | 0.366  | 0.082 |
| <i>A. morrisonense</i>  |     |                         |       |       |       |       |       |       |       |       |       |       |       |       |        |       |
| MF                      | 28  | 0.0276                  | 2.118 | 0.331 | 1.394 | 0.142 | 0.338 | 0.096 | 0.193 | 0.060 | 0.196 | 0.056 | 0.200 | 0.057 | 0.142  | 0.101 |
| TRK                     | 32  | 0.0185                  | 3.059 | 0.449 | 1.601 | 0.204 | 0.487 | 0.121 | 0.177 | 0.057 | 0.254 | 0.063 | 0.258 | 0.064 | 0.380  | 0.101 |
| SY                      | 24  | 0.0416                  | 2.471 | 0.298 | 1.483 | 0.168 | 0.402 | 0.107 | 0.154 | 0.050 | 0.219 | 0.061 | 0.224 | 0.062 | 0.234  | 0.077 |
| TPS                     | 26  | 0.0384                  | 2.471 | 0.394 | 1.423 | 0.173 | 0.354 | 0.109 | 0.124 | 0.043 | 0.185 | 0.060 | 0.188 | 0.061 | 0.302  | 0.081 |
| DXS                     | 28  | 0.1071                  | 2.235 | 0.315 | 1.466 | 0.141 | 0.388 | 0.098 | 0.170 | 0.056 | 0.228 | 0.060 | 0.232 | 0.061 | 0.295  | 0.103 |
| TTC                     | 30  | 0.0166                  | 2.353 | 0.296 | 1.471 | 0.147 | 0.395 | 0.097 | 0.224 | 0.068 | 0.229 | 0.059 | 0.233 | 0.060 | 0.180  | 0.111 |
| ALS                     | 29  | 0                       | 2.412 | 0.403 | 1.536 | 0.168 | 0.431 | 0.110 | 0.174 | 0.064 | 0.244 | 0.063 | 0.248 | 0.064 | 0.297  | 0.122 |
| LD                      | 36  | 0                       | 3.647 | 0.658 | 1.584 | 0.153 | 0.551 | 0.117 | 0.191 | 0.051 | 0.282 | 0.059 | 0.285 | 0.060 | 0.370  | 0.086 |
| LLS                     | 17  | 0.0357                  | 3.000 | 0.470 | 1.615 | 0.174 | 0.536 | 0.118 | 0.166 | 0.052 | 0.281 | 0.060 | 0.289 | 0.062 | 0.429  | 0.124 |
| STC                     | 10  | 0                       | 1.824 | 0.300 | 1.407 | 0.149 | 0.317 | 0.106 | 0.241 | 0.083 | 0.186 | 0.062 | 0.196 | 0.065 | -0.256 | 0.044 |
| SKR                     | 18  | 0                       | 2.118 | 0.225 | 1.369 | 0.105 | 0.354 | 0.081 | 0.186 | 0.055 | 0.208 | 0.051 | 0.214 | 0.052 | 0.224  | 0.119 |
| DD                      | 6   | 0                       | 1.882 | 0.241 | 1.461 | 0.127 | 0.386 | 0.098 | 0.196 | 0.069 | 0.234 | 0.059 | 0.256 | 0.065 | 0.267  | 0.131 |
| JBS                     | 2   | 0                       | 1.294 | 0.143 | 1.204 | 0.108 | 0.160 | 0.077 | 0.147 | 0.071 | 0.103 | 0.048 | 0.137 | 0.064 | -0.400 | 0.032 |
| Total                   | 286 | -                       | 6.235 | 1.130 | 1.578 | 0.175 | 0.525 | 0.115 | 0.180 | 0.050 | 0.261 | 0.062 | 0.261 | 0.062 | 0.398  | 0.088 |

**Table S4.** Pairwise  $F_{ST}$  between populations of two maple species. Bolds denotes the inter-population pairwise  $F_{ST}$  between species

|                         |       | <i>A. caudatifolium</i> |       |       |       |       |       |       |       |       |       |       |       |       |       |       |       |       |       |       |       | <i>A. morrisonense</i> |       |       |       |       |       |       |       |       |       |       |       |
|-------------------------|-------|-------------------------|-------|-------|-------|-------|-------|-------|-------|-------|-------|-------|-------|-------|-------|-------|-------|-------|-------|-------|-------|------------------------|-------|-------|-------|-------|-------|-------|-------|-------|-------|-------|-------|
|                         |       | YMS                     | MF    | TRK   | SY    | TPS   | MC    | JS    | DXS   | RL    | TTC   | ALS   | TJ    | LD    | LLS   | RF    | STC   | JSY   | SKR   | DD    | JBS   | MF                     | TRK   | SY    | TPS   | DXS   | TTC   | ALS   | LD    | LLS   | STC   | SKR   | DD    |
| <i>A. caudatifolium</i> | MF    | 0.051                   |       |       |       |       |       |       |       |       |       |       |       |       |       |       |       |       |       |       |       |                        |       |       |       |       |       |       |       |       |       |       |       |
|                         | TRK   | 0.058                   | 0.039 |       |       |       |       |       |       |       |       |       |       |       |       |       |       |       |       |       |       |                        |       |       |       |       |       |       |       |       |       |       |       |
|                         | SY    | 0.053                   | 0.049 | 0.036 |       |       |       |       |       |       |       |       |       |       |       |       |       |       |       |       |       |                        |       |       |       |       |       |       |       |       |       |       |       |
|                         | TPS   | 0.045                   | 0.070 | 0.058 | 0.036 |       |       |       |       |       |       |       |       |       |       |       |       |       |       |       |       |                        |       |       |       |       |       |       |       |       |       |       |       |
|                         | MC    | 0.038                   | 0.055 | 0.054 | 0.044 | 0.029 |       |       |       |       |       |       |       |       |       |       |       |       |       |       |       |                        |       |       |       |       |       |       |       |       |       |       |       |
|                         | JS    | 0.056                   | 0.074 | 0.062 | 0.052 | 0.047 | 0.049 |       |       |       |       |       |       |       |       |       |       |       |       |       |       |                        |       |       |       |       |       |       |       |       |       |       |       |
|                         | DXS   | 0.124                   | 0.133 | 0.113 | 0.120 | 0.124 | 0.108 | 0.075 |       |       |       |       |       |       |       |       |       |       |       |       |       |                        |       |       |       |       |       |       |       |       |       |       |       |
|                         | RL    | 0.150                   | 0.142 | 0.132 | 0.136 | 0.175 | 0.152 | 0.104 | 0.056 |       |       |       |       |       |       |       |       |       |       |       |       |                        |       |       |       |       |       |       |       |       |       |       |       |
|                         | TTC   | 0.066                   | 0.042 | 0.036 | 0.060 | 0.065 | 0.054 | 0.061 | 0.110 | 0.103 |       |       |       |       |       |       |       |       |       |       |       |                        |       |       |       |       |       |       |       |       |       |       |       |
|                         | ALS   | 0.142                   | 0.136 | 0.124 | 0.129 | 0.141 | 0.147 | 0.083 | 0.050 | 0.028 | 0.095 |       |       |       |       |       |       |       |       |       |       |                        |       |       |       |       |       |       |       |       |       |       |       |
|                         | TJ    | 0.236                   | 0.242 | 0.203 | 0.214 | 0.268 | 0.255 | 0.181 | 0.123 | 0.131 | 0.163 | 0.099 |       |       |       |       |       |       |       |       |       |                        |       |       |       |       |       |       |       |       |       |       |       |
|                         | LD    | 0.092                   | 0.091 | 0.075 | 0.081 | 0.086 | 0.087 | 0.054 | 0.030 | 0.040 | 0.065 | 0.027 | 0.084 |       |       |       |       |       |       |       |       |                        |       |       |       |       |       |       |       |       |       |       |       |
|                         | LLS   | 0.072                   | 0.089 | 0.078 | 0.079 | 0.069 | 0.059 | 0.044 | 0.033 | 0.070 | 0.079 | 0.064 | 0.129 | 0.032 |       |       |       |       |       |       |       |                        |       |       |       |       |       |       |       |       |       |       |       |
|                         | RF    | 0.095                   | 0.123 | 0.105 | 0.097 | 0.117 | 0.112 | 0.080 | 0.066 | 0.108 | 0.115 | 0.092 | 0.215 | 0.058 | 0.056 |       |       |       |       |       |       |                        |       |       |       |       |       |       |       |       |       |       |       |
|                         | STC   | 0.303                   | 0.329 | 0.300 | 0.260 | 0.373 | 0.336 | 0.273 | 0.215 | 0.224 | 0.257 | 0.228 | 0.421 | 0.186 | 0.223 | 0.306 |       |       |       |       |       |                        |       |       |       |       |       |       |       |       |       |       |       |
| JSY                     | 0.149 | 0.148                   | 0.153 | 0.131 | 0.173 | 0.175 | 0.128 | 0.115 | 0.102 | 0.127 | 0.067 | 0.161 | 0.064 | 0.109 | 0.136 | 0.306 |       |       |       |       |       |                        |       |       |       |       |       |       |       |       |       |       |       |
| SKR                     | 0.086 | 0.095                   | 0.080 | 0.076 | 0.068 | 0.083 | 0.041 | 0.050 | 0.076 | 0.088 | 0.052 | 0.123 | 0.033 | 0.038 | 0.057 | 0.222 | 0.077 |       |       |       |       |                        |       |       |       |       |       |       |       |       |       |       |       |
| DD                      | 0.137 | 0.126                   | 0.131 | 0.134 | 0.168 | 0.158 | 0.114 | 0.069 | 0.099 | 0.130 | 0.076 | 0.182 | 0.051 | 0.070 | 0.086 | 0.283 | 0.098 | 0.062 |       |       |       |                        |       |       |       |       |       |       |       |       |       |       |       |
| JBS                     | 0.122 | 0.112                   | 0.125 | 0.118 | 0.120 | 0.102 | 0.099 | 0.064 | 0.082 | 0.103 | 0.071 | 0.166 | 0.044 | 0.057 | 0.090 | 0.220 | 0.075 | 0.063 | 0.073 |       |       |                        |       |       |       |       |       |       |       |       |       |       |       |
| <i>A. morrisonense</i>  | MF    | 0.356                   | 0.358 | 0.345 | 0.386 | 0.364 | 0.370 | 0.371 | 0.368 | 0.362 | 0.313 | 0.360 | 0.463 | 0.322 | 0.302 | 0.420 | 0.570 | 0.440 | 0.315 | 0.420 | 0.375 |                        |       |       |       |       |       |       |       |       |       |       |       |
|                         | TRK   | 0.292                   | 0.294 | 0.280 | 0.314 | 0.299 | 0.303 | 0.308 | 0.307 | 0.298 | 0.257 | 0.300 | 0.371 | 0.265 | 0.249 | 0.352 | 0.451 | 0.342 | 0.263 | 0.330 | 0.309 | 0.035                  |       |       |       |       |       |       |       |       |       |       |       |
|                         | SY    | 0.335                   | 0.337 | 0.319 | 0.357 | 0.343 | 0.349 | 0.341 | 0.336 | 0.324 | 0.313 | 0.324 | 0.420 | 0.314 | 0.298 | 0.383 | 0.519 | 0.372 | 0.293 | 0.358 | 0.347 | 0.024                  | 0.031 |       |       |       |       |       |       |       |       |       |       |
|                         | TPS   | 0.349                   | 0.358 | 0.345 | 0.376 | 0.359 | 0.366 | 0.363 | 0.353 | 0.342 | 0.334 | 0.344 | 0.448 | 0.330 | 0.310 | 0.397 | 0.535 | 0.416 | 0.307 | 0.400 | 0.357 | 0.079                  | 0.039 | 0.061 |       |       |       |       |       |       |       |       |       |
|                         | DXS   | 0.364                   | 0.368 | 0.344 | 0.388 | 0.372 | 0.380 | 0.368 | 0.362 | 0.363 | 0.324 | 0.359 | 0.460 | 0.324 | 0.301 | 0.411 | 0.569 | 0.408 | 0.309 | 0.390 | 0.381 | 0.035                  | 0.041 | 0.023 | 0.085 |       |       |       |       |       |       |       |       |
|                         | TTC   | 0.333                   | 0.343 | 0.319 | 0.346 | 0.336 | 0.347 | 0.333 | 0.331 | 0.323 | 0.332 | 0.320 | 0.419 | 0.314 | 0.300 | 0.381 | 0.521 | 0.378 | 0.306 | 0.367 | 0.348 | 0.062                  | 0.037 | 0.034 | 0.062 | 0.044 |       |       |       |       |       |       |       |
|                         | ALS   | 0.384                   | 0.397 | 0.371 | 0.406 | 0.393 | 0.405 | 0.381 | 0.372 | 0.364 | 0.342 | 0.359 | 0.477 | 0.330 | 0.315 | 0.423 | 0.555 | 0.420 | 0.322 | 0.405 | 0.388 | 0.068                  | 0.048 | 0.038 | 0.072 | 0.053 | 0.015 |       |       |       |       |       |       |
|                         | LD    | 0.352                   | 0.364 | 0.340 | 0.375 | 0.361 | 0.370 | 0.344 | 0.329 | 0.327 | 0.315 | 0.319 | 0.430 | 0.294 | 0.281 | 0.378 | 0.519 | 0.378 | 0.285 | 0.360 | 0.342 | 0.068                  | 0.040 | 0.044 | 0.058 | 0.053 | 0.024 | 0.015 |       |       |       |       |       |
|                         | LLS   | 0.329                   | 0.339 | 0.312 | 0.350 | 0.338 | 0.345 | 0.325 | 0.299 | 0.302 | 0.338 | 0.296 | 0.381 | 0.290 | 0.275 | 0.333 | 0.510 | 0.340 | 0.272 | 0.321 | 0.316 | 0.073                  | 0.056 | 0.057 | 0.070 | 0.062 | 0.068 | 0.053 | 0.035 |       |       |       |       |
|                         | STC   | 0.438                   | 0.463 | 0.404 | 0.476 | 0.457 | 0.469 | 0.403 | 0.401 | 0.397 | 0.371 | 0.393 | 0.519 | 0.358 | 0.336 | 0.452 | 0.642 | 0.451 | 0.347 | 0.437 | 0.415 | 0.063                  | 0.045 | 0.040 | 0.063 | 0.061 | 0.022 | 0.029 | 0.043 | 0.079 |       |       |       |
|                         | SKR   | 0.379                   | 0.398 | 0.358 | 0.400 | 0.389 | 0.403 | 0.368 | 0.365 | 0.368 | 0.325 | 0.364 | 0.467 | 0.328 | 0.307 | 0.403 | 0.600 | 0.420 | 0.306 | 0.406 | 0.395 | 0.070                  | 0.045 | 0.053 | 0.065 | 0.052 | 0.046 | 0.052 | 0.042 | 0.038 | 0.056 |       |       |
|                         | DD    | 0.369                   | 0.375 | 0.359 | 0.400 | 0.381 | 0.387 | 0.370 | 0.359 | 0.351 | 0.324 | 0.346 | 0.460 | 0.316 | 0.299 | 0.414 | 0.557 | 0.429 | 0.310 | 0.411 | 0.364 | 0.059                  | 0.053 | 0.035 | 0.091 | 0.055 | 0.046 | 0.040 | 0.034 | 0.057 | 0.077 | 0.071 |       |
|                         | JBS   | 0.505                   | 0.531 | 0.466 | 0.557 | 0.532 | 0.538 | 0.469 | 0.463 | 0.460 | 0.423 | 0.456 | 0.594 | 0.415 | 0.386 | 0.518 | 0.718 | 0.556 | 0.399 | 0.532 | 0.470 | 0.160                  | 0.111 | 0.084 | 0.165 | 0.136 | 0.093 | 0.109 | 0.094 | 0.130 | 0.175 | 0.146 | 0.100 |

**Table S5.** Model comparison between four scenarios with the Bayes factor

|    | <b>CM</b> | <b>AM</b> | <b>SC</b> | <b>SI</b> |
|----|-----------|-----------|-----------|-----------|
| CM | 1         | 2.4399    | 0.7379    | 72.7905   |
| AM | 0.4098    | 1         | 0.3024    | 29.8330   |
| SC | 1.3552    | 3.3066    | 1         | 98.6451   |
| SI | 0.0137    | 0.0335    | 0.0101    | 1         |

**Table S6.** Estimates of model parameters for the four scenarios through approximate Bayesian computation

|                 | $Ne_{anc}$ | $Ne_{cau\ t1}$ | $Ne_{mor\ t1}$ | $Ne_{cau\ t2}$ | $Ne_{mor\ t2}$ | $m_1$   | $m_2$   | $t_1$  | $t_2$  | $\mu$    |
|-----------------|------------|----------------|----------------|----------------|----------------|---------|---------|--------|--------|----------|
| SC              |            |                |                |                |                |         |         |        |        |          |
| mode            | 149670     | 8232           | 24220          | 1792           | 366            | 8.0E-5  | 2.0E-5  | 22925  | 18870  | 1.9E-4   |
| mean            | 125338     | 6938           | 18696          | 1722           | 339            | 1.5E-4  | 1.2E-4  | 18526  | 28881  | 1.9E-4   |
| median          | 135659     | 7421           | 20155          | 1749           | 348            | 1.3E-4  | 5.0E-5  | 18687  | 23748  | 1.9E-4   |
| Wt. 2.5% perc.  | 39472      | 2848           | 2495           | 1441           | 256            | 5.0E-5  | 0       | 9349   | 14067  | 1.8E-4   |
| Wt. 97.5% perc. | 187873     | 9750           | 38419          | 1854           | 381            | 3.3E-4  | 5.7E-4  | 27664  | 66799  | 2.1E-4   |
| CM              |            |                |                |                |                |         |         |        |        |          |
| mode            | 1931504    | 73878          | 255311         | 3886           | 3896           | 4E-08   | 6.2E-6  | 6356   | 425    | 3.4E-4   |
| mean            | 1424233    | 52035          | 226709         | 3149           | 3607           | 1.4E-07 | 7.5E-6  | 5451   | 663    | 5.4E-4   |
| median          | 1552088    | 57047          | 237125         | 3292           | 3698           | 9E-08   | 7.4E-6  | 5497   | 556    | 4.8E-4   |
| Wt. 2.5% perc.  | 382271     | 9568           | 143124         | 1065           | 2706           | 1E-08   | 5.2E-6  | 3033   | 320    | 2.3E-4   |
| Wt. 97.5% perc. | 2281474    | 99174          | 277702         | 4844           | 4084           | 5.3E-07 | 1.04E-5 | 7603   | 1540   | 1.08E-03 |
| AM              |            |                |                |                |                |         |         |        |        |          |
| mode            | 125863     | 310881         | 2529           | 6130           | 5944           | 2.2E-06 | 0.005   | 3502   | 555    | 2.9E-4   |
| mean            | 89787      | 197772         | 2080           | 4542           | 5633           | 0.001   | 0.027   | 16006  | 12805  | 9.0E-4   |
| median          | 95656      | 217563         | 2219           | 4759           | 5757           | 1.5E-5  | 0.012   | 10597  | 1280   | 6.6E-4   |
| Wt. 2.5% perc.  | 8808       | 7812           | 850            | 1051           | 4513           | 0       | 0.001   | 380    | 117    | 1.4E-4   |
| Wt. 97.5% perc. | 177600     | 522977         | 2939           | 7106           | 6163           | 0.013   | 0.119   | 58411  | 111091 | 2.91E-03 |
| SI              |            |                |                |                |                |         |         |        |        |          |
| mode            | 2145651    | 293434         | 168879         | 8814           | 2541           | -       | -       | 18179  | 1324   | 4.0E-5   |
| mean            | 1298101    | 250791         | 121772         | 5144           | 2485           | -       | -       | 181421 | 18188  | 2.2E-4   |
| median          | 1290808    | 253427         | 123777         | 5210           | 2485           | -       | -       | 61372  | 1571   | 1.1E-4   |
| Wt. 2.5% perc.  | 4502       | 943            | 612            | 357            | 192            | -       | -       | 516    | 125    | 1.0E-5   |
| Wt. 97.5% perc. | 4768009    | 939528         | 458900         | 9738           | 4737           | -       | -       | 884502 | 168403 | 8.9E-4   |
